# Supplementary material for: CFTR dysfunction in smooth muscle drives TGFβ dependent airway hyperreactivity
Source: PubMed Central journal article supplement (PMC10416378; doi:10.1186/s12931-023-02495-2), 2023-08-11
Supplement: 12931_2023_2495_MOESM1_ESM.pdf [file 12931_2023_2495_MOESM1_ESM.pdf]

## Supplemental Figure S1

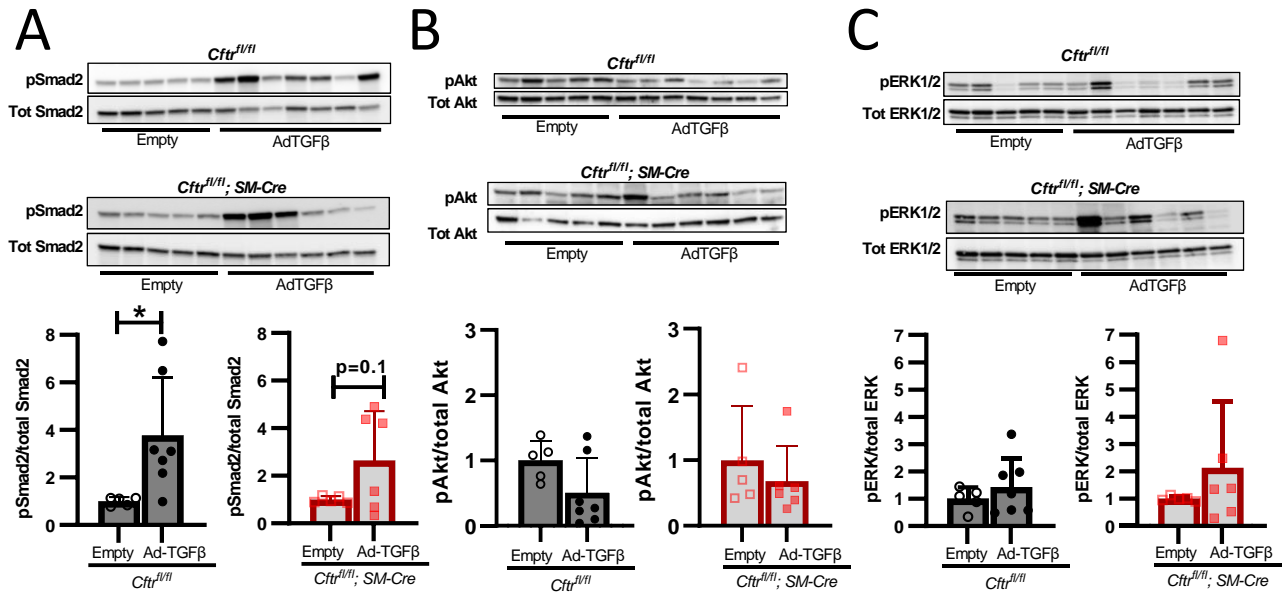

**Fig S1.** Western blot analysis of whole lung homogenates indicates increases in canonical (Smad2) signaling and no significant changes in non-canonical (PI3K and MAPK) signaling after pulmonary Ad-TGFβ treatment. **A.** Significantly increased phospho-Smad2 normalized to total Smad2 was seen in control *Cfr<sup>fl/fl</sup>* mice exposed to Ad-TGFβ as compared with empty vector treated mice, with *Cfr<sup>fl/fl</sup>; SM-Cre* mice showing a trend towards increased Smad signaling. \*  $P < 0.05$  by two-tailed  $t$ -test. **B.** No significant differences in TGFβ-induced PI3K signaling, as measured by phospho/total Akt, were noted. **C.** Similarly, ERK1/2 (MAPK) signaling was not significantly altered by TGFβ exposure in either mouse group. Data are presented as mean ± SD.
